# Supplementary material for: Phosphorylation of RXRα mediates the effect of JNK to suppress hepatic FGF21 expression and promote metabolic syndrome
Source: PubMed Central journal article supplement — Proc Natl Acad Sci U S A. 2022 Oct 25;119(44):e2210434119. doi: 10.1073/pnas.2210434119 (PMC9636906; doi:10.1073/pnas.2210434119), 2022-10-25
Supplement: pnas.2210434119.sapp.pdf [file pnas.2210434119.sapp.pdf]

## **Supplementary Information for**

### **Phosphorylation of RXR $\alpha$ mediates the effect of JNK to suppress hepatic FGF21 expression and promote metabolic syndrome**

Santiago Vernia, Alexandra Lee, Norman J. Kennedy, Myoung Sook Han, Marta Isasa, Julie Cavanagh-Kyros, Armanda Roy, Aafreen Syed, Shanzah Chaudhry, Yvonne J. K. Edwards, Steven P. Gygi, Guangping Gao, and Roger J. Davis

Santiago Vernia and Roger J. Davis

Email: [Santiago.Vernia@lms.mrc.ac.uk](mailto:Santiago.Vernia@lms.mrc.ac.uk) and [Roger.Davis@umassmed.edu](mailto:Roger.Davis@umassmed.edu)

#### **This PDF file includes:**

Figures S1 to S4  
Table S1  
SI References

#### **Other supplementary materials for this manuscript include the following:**

Dataset S1

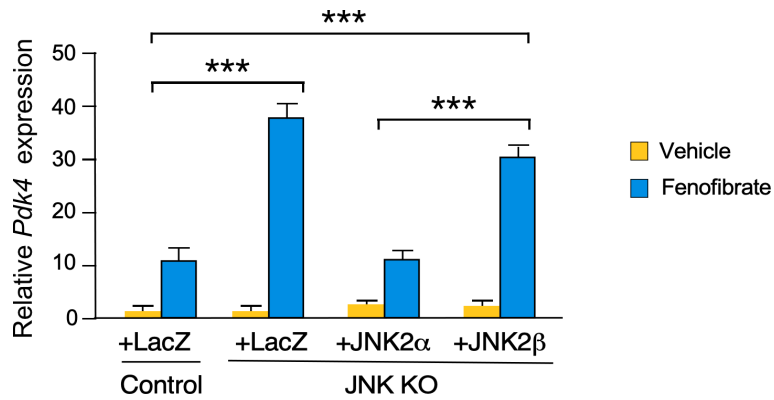

**Fig. S1. Effect of hepatic JNK2 $\alpha$  and JNK2 $\beta$  on the expression of the PPAR $\alpha$  target gene *Pdk4*.**

JNK knockout (JNK KO) mice with compound deficiency of JNK1 plus JNK2 in hepatocytes (*Alb-Cre<sup>+/-</sup> Mapk8<sup>loxP/loxP</sup> Mapk9<sup>loxP/loxP</sup>*) were transduced with AAV8 vectors expressing LacZ, JNK2 $\alpha$ , or JNK2 $\beta$ . Control (*Alb-Cre<sup>+/-</sup> Mapk8<sup>loxP/loxP</sup> Mapk9<sup>loxP/loxP</sup>*) mice were transduced with an AAV8 vector expressing LacZ. The mice were euthanized at age 24 wks and primary hepatocytes were prepared. The cells were cultured 24 h and then treated without or with 100  $\mu$ M fenofibrate (16 h). The expression of *Pdk4* mRNA was measured by RT-qPCR assays (mean  $\pm$  SEM; \*\*\*,  $p < 0.001$ ;  $n = 6$ ).

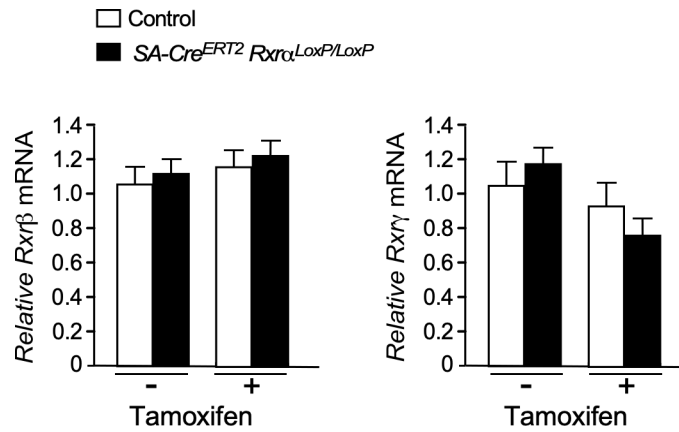

**Fig. S2. Effect of *Rxrα* gene ablation on the expression on hepatic *Rxrβ* and *Rxrγ* mRNA expression.**

Control SA-Cre<sup>ERT2</sup> mice and SA-Cre<sup>ERT2</sup> *Rxrα*<sup>loxP/loxP</sup> mice were treated without or with Tamoxifen at age 8 wks, fed a HFD starting at age 10 wks, and euthanized at age 18 wks. The expression of *Rxrβ*, and *Rxrγ* mRNA in the liver was measured by RT-qPCR assays (mean ± SEM; n = 5-9).

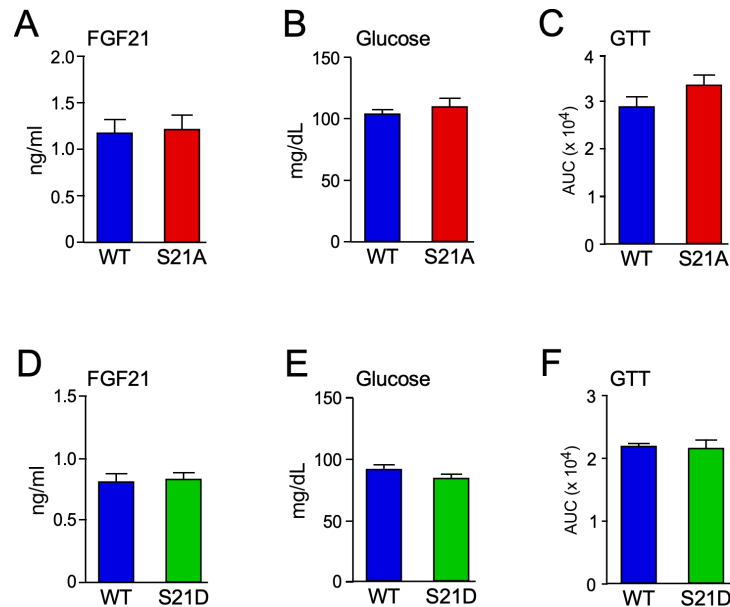

**Fig. S3. Hepatic hXRRA phosphorylation on Ser<sup>21</sup> causes no change in FGF21 signaling.**

(A,B) Control *SA-Cre<sup>ERT2</sup>* mice and *SA-Cre<sup>ERT2</sup> Rxra<sup>loxP/loxP</sup>* mice (age 7 wks) were transduced with AAV8 viruses expressing hXRRA or Ser21Ala-hXRRA. The mice were treated without or with Tamoxifen at age 8 wks, fed a HFD starting at age 10 wks, and euthanized at age 18 wks. Fasting blood FGF21 and glucose concentration in HFD-fed mice expressing hXRRA or Ser21Ala hXRRA in hepatocytes was measured (mean +/- SEM; n = 9 ~ 10).

(C) Glucose tolerance tests (GTT) on mice expressing hXRRA or Ser21Ala hXRRA in hepatocytes were performed (mean +/- SEM; n = 9 ~ 10).

(D,E) Fasting blood FGF21 and glucose concentration in CD-fed mice expressing hXRRA or Ser21Asp hXRRA in hepatocytes was measured (mean +/- SEM; \*, p<0.05; n = 11 ~ 12).

(F) GTT on mice expressing hXRRA or Ser21Asp hXRRA in hepatocytes were performed (mean +/- SEM; n = 11 ~ 12).

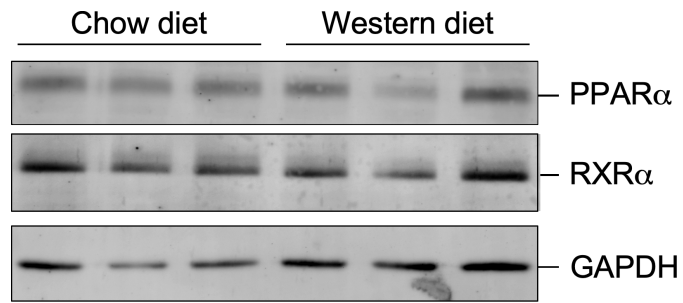

**Fig. S4. Effect of nutritional stress on the hepatic expression of PPAR $\alpha$  and RXR $\alpha$ .**

Wild-type mice (aged 10 wks.) were fed a chow diet (CD) or a Western Diet (WD) and euthanized at age 18 wks. Liver extracts prepared from 3 mice per group were examined by immunoblot analysis by probing with antibodies to PPAR $\alpha$ , RXR $\alpha$ , and GAPDH.

**Table S1. Source of Research Materials**

| REAGENT or RESOURCE                                              | SOURCE                    | IDENTIFIER                        |
|------------------------------------------------------------------|---------------------------|-----------------------------------|
| <b>Antibodies</b>                                                |                           |                                   |
| Mouse monoclonal antibody to JUN                                 | Cell Signaling Technology | Cat# 2315; RRID:AB_490780)        |
| Rabbit polyclonal antibody to pSer <sup>63</sup> -JUN            | Cell Signaling Technology | Cat# 9261; RRID:AB_213016292      |
| Rabbit monoclonal antibody to RXR $\alpha$                       | Abcam                     | Cat# ab125001, RRID:AB_10975632   |
| Rabbit polyclonal antibody to pSer <sup>22</sup> RXR $\alpha$    | This study                | N/A                               |
| Mouse polyclonal antibody to PPAR $\alpha$ (Immunofluorescence)  | Millipore Sigma           | Cat# SAB1406277, RRID:AB_10741281 |
| Mouse monoclonal antibody to PPAR $\alpha$ (Immunoblot)          | Millipore Sigma           | Cat# MAB3890; RRID:AB_2165744     |
| Mouse monoclonal antibody to JNK1/2                              | BD Biosciences            | Cat# 554285, RRID:AB_395344       |
| Rabbit polyclonal antibody to GAPDH                              | Santa Cruz Biotechnology  | Cat# sc-25778, RRID:AB_10167668   |
| Mouse monoclonal antibody to $\alpha$ Tubulin                    | Millipore Sigma           | Cat# T5168, RRID:AB_477579        |
| IRDye 680RD conjugated-goat anti-mouse IgG antibody              | LI-COR Biosciences        | Cat# 926-68070, RRID:AB_10956588  |
| IRDye 800CW conjugated-goat anti-rabbit IgG antibody             | LI-COR Biosciences        | Cat# 926-32211, RRID:AB_621843    |
| Alexa-Fluor 488 conjugated-goat anti-mouse IgG (H + L) antibody  | ThermoFisher Scientific   | Cat# A21052, RRID:AB_2535719      |
| Alexa-Fluor 633 conjugated-goat anti-rabbit IgG (H + L) antibody | ThermoFisher Scientific   | Cat# A-11034, RRID:AB_2576217     |
| <b>Bacterial and Virus Strains</b>                               |                           |                                   |
| N/A                                                              |                           |                                   |
| Biological Samples                                               |                           |                                   |
| N/A                                                              |                           |                                   |
| <b>Chemicals, Peptides, and Recombinant Proteins</b>             |                           |                                   |
| Pyruvate                                                         | Millipore Sigma           | Cat# P5280                        |
| Glucose                                                          | J.T. Baker                | Cat#1 916-01                      |
| Fenofibrate                                                      | Millipore Sigma           | Cat# 6020                         |
| Liver Perfusion Media                                            | ThermoFisher Scientific   | Cat# 17701038                     |
| Liver Digest Buffer                                              | ThermoFisher Scientific   | Cat# 17703034                     |
| Rat tail collagen I                                              | ThermoFisher Scientific   | Cat# A1048301                     |
| DMEM                                                             | ThermoFisher Scientific   | Cat# 11960051                     |
| Bovine Growth Serum                                              | ThermoFisher Scientific   | Cat# SH3054103                    |
| L-Glutamine (100X)                                               | ThermoFisher Scientific   | Cat# 250300081                    |
| Penicillin/Streptomycin (100X)                                   | ThermoFisher Scientific   | Cat# 15140122                     |

|                                                      |                                                             |                                                                                                                                                           |
|------------------------------------------------------|-------------------------------------------------------------|-----------------------------------------------------------------------------------------------------------------------------------------------------------|
| Lipofectamine 2000                                   | Thermo Fisher Scientific                                    | Cat# 11668500                                                                                                                                             |
| DAPI                                                 | ThermoFisher Scientific                                     | Cat#D3571, RRID:AB_2307445                                                                                                                                |
| O.C.T. compound                                      | ThermoFisher Scientific                                     | Cat# 23-730-571                                                                                                                                           |
| Alexa-Fluor 546-conjugated phalloidin                | ThermoFisher Scientific                                     | Cat# A22283                                                                                                                                               |
| Chow diet                                            | Purina                                                      | Cat# Iso Pro 3000                                                                                                                                         |
| High Fat Diet                                        | Bio-Serv                                                    | Cat# S3282                                                                                                                                                |
| Western Diet                                         | Research Diets                                              | Cat# D17063001Bi                                                                                                                                          |
| <b>Critical Commercial Assays</b>                    |                                                             |                                                                                                                                                           |
| RNAeasy kit                                          | Qiagen                                                      | Cat# 74106                                                                                                                                                |
| Taqman Fast Universal PCR Master Mix                 | ThermoFisher Scientific                                     | Cat# 4352042                                                                                                                                              |
| High Capacity cDNA Reverse Transcription Kit         | ThermoFisher Scientific                                     | Cat# 4368813                                                                                                                                              |
| Taqman Probe for mouse <i>Pdk4</i>                   | ThermoFisher Scientific                                     | Mm01166878_m1                                                                                                                                             |
| Taqman Probe for human <i>Rxra</i>                   | ThermoFisher Scientific                                     | Hs01067640_m1                                                                                                                                             |
| Universal ProbeLibrary Probe #63                     | Roche                                                       | Cat# 04688619001                                                                                                                                          |
| FGF21 ELISA                                          | Millipore Sigma                                             | Cat# EZRMFGF21-26K                                                                                                                                        |
| <b>Deposited Data</b>                                |                                                             |                                                                                                                                                           |
| Mass Spec Data                                       | ProteomeXchange Consortium via the PRIDE partner repository | Accession Number: PXD034183.<br><a href="http://www.ebi.ac.uk/pride/archive/projects/PXD034183">http://www.ebi.ac.uk/pride/archive/projects/PXD034183</a> |
| <b>Experimental Models: Cell Lines</b>               |                                                             |                                                                                                                                                           |
| N/A                                                  |                                                             |                                                                                                                                                           |
| <b>Experimental Models: Organisms/Strains</b>        |                                                             |                                                                                                                                                           |
| C57BL/6J mice                                        | The Jackson Laboratory                                      | RRID:IMSR_JAX:000664                                                                                                                                      |
| B6.Cg-Speer6-ps1 <sup>Tg(alb-cre)21Mgn</sup> /J mice | The Jackson Laboratory                                      | RRID:IMSR_JAX:003574                                                                                                                                      |
| <i>Rxra</i> <sup>tm1Krc</sup> /J mice                | The Jackson Laboratory                                      | <i>Rxra</i> <sup>tm1Krc</sup> /J mice (RRID:IMSR_JAX:013086)                                                                                              |
| <i>Alb</i> <sup>tm1(cre/ERT2)Mtz</sup> mice          | Metzger colony                                              | (1)                                                                                                                                                       |
| <i>Mapk8</i> <sup>LoxP/LoxP</sup> mice               | Davis colony                                                | (2)                                                                                                                                                       |
| <i>Mapk9</i> <sup>LoxP/LoxP</sup> mice               | Davis colony                                                | (3).                                                                                                                                                      |
| <b>Oligonucleotides</b>                              |                                                             |                                                                                                                                                           |
| Oligonucleotides                                     | Eurofins Genomics LLC.                                      | N/A                                                                                                                                                       |
| <b>Recombinant DNA</b>                               |                                                             |                                                                                                                                                           |
| pAAV-CB6-PI                                          | N/A                                                         | (4)                                                                                                                                                       |
| pAAV-CB6-PI-LacZ                                     | N/A                                                         | Rashnonejad et al., 2016)                                                                                                                                 |

|                                                 |                         |                                                                                                                                                                                                                                         |
|-------------------------------------------------|-------------------------|-----------------------------------------------------------------------------------------------------------------------------------------------------------------------------------------------------------------------------------------|
| pAAV-CB6-PI-mJNK2 $\alpha$ 2                    | This study              | N/A                                                                                                                                                                                                                                     |
| pAAV-CB6-PI-mJNK2 $\beta$ 2                     | This study              | N/A                                                                                                                                                                                                                                     |
| pCV-Sport-hR $\alpha$                           | Addgene #8882           | RRID:Addgene_8882                                                                                                                                                                                                                       |
| pAAV-CB6-PI-hR $\alpha$                         | This study              | N/A                                                                                                                                                                                                                                     |
| pAAV-CB6-PI-hR $\alpha$ (Ser260Ala)             | This study              | N/A                                                                                                                                                                                                                                     |
| pAAV-CB6-PI-hR $\alpha$ (Ser260Asp)             | This study              | N/A                                                                                                                                                                                                                                     |
| pAAV-CB6-PI-hR $\alpha$ (Ser21Ala)              | This study              | N/A                                                                                                                                                                                                                                     |
| pAAV-CB6-PI-hR $\alpha$ (Ser21Asp)              | This study              | N/A                                                                                                                                                                                                                                     |
| <b>Software and Algorithms</b>                  |                         |                                                                                                                                                                                                                                         |
| ImageJ2 (Version 2.3.0/1.53q, Build d544a3f481) | Open Source             | <a href="https://imagej.nih.gov/ij">https://imagej.nih.gov/ij</a>                                                                                                                                                                       |
| Photoshop (Version CC 2017)                     | Adobe                   | <a href="http://www.adobe.com/Photoshop">www.adobe.com/Photoshop</a>                                                                                                                                                                    |
| Image Studio (Version 3.1)                      | LI-COR                  | <a href="https://www.licor.com/bio/products/software/image_studio_lite">https://www.licor.com/bio/products/software/image_studio_lite</a>                                                                                               |
| QuantStudio 12K Flex Software (version 1.3)     | ThermoFisher Scientific | <a href="https://www.thermofisher.com/us/en/home/technical-resources/software-downloads/quantstudio-12k-software.html">https://www.thermofisher.com/us/en/home/technical-resources/software-downloads/quantstudio-12k-software.html</a> |
| Excel (Version 16.38)                           | Microsoft               | Office 365                                                                                                                                                                                                                              |
| Canvas X DRAW 7 (Version 7.0.3)                 | Canvas GFX              | <a href="https://www.canvasgfx.com/en/products/canvas-x/">https://www.canvasgfx.com/en/products/canvas-x/</a>                                                                                                                           |
| Complex heatmap package (version 1.10.2)        | N/A                     | (5)                                                                                                                                                                                                                                     |
| Leica Application Suite X (version 3.5.18963.2) | Leica                   | <a href="https://www.leica-microsystems.com/products/microscope-software/p/leica-las-x-ls/">https://www.leica-microsystems.com/products/microscope-software/p/leica-las-x-ls/</a>                                                       |
| GraphPad Prism 7 (Version 7.0)                  | GraphPad Software       | <a href="https://www.graphpad.com/scientific-software/prism">https://www.graphpad.com/scientific-software/prism</a>                                                                                                                     |



**Dataset S1 (separate file).** Quantitative Phosphoproteomic Analysis.

### **SI References**

1. M. Schuler, A. Dierich, P. Chambon, D. Metzger, Efficient temporally controlled targeted somatic mutagenesis in hepatocytes of the mouse. *Genesis* **39**, 167-172 (2004).
2. M. Das *et al.*, Suppression of p53-dependent senescence by the JNK signal transduction pathway. *Proc Natl Acad Sci U S A* **104**, 15759-15764 (2007).
3. M. S. Han *et al.*, JNK expression by macrophages promotes obesity-induced insulin resistance and inflammation. *Science* **339**, 218-222 (2013).
4. A. Rashnonejad, G. A. Chermahini, S. Li, F. Ozkinay, G. Gao, Large-Scale Production of Adeno-Associated Viral Vector Serotype-9 Carrying the Human Survival Motor Neuron Gene. *Mol Biotechnol* **58**, 30-36 (2016).
5. Z. Gu, R. Eils, M. Schlesner, Complex heatmaps reveal patterns and correlations in multidimensional genomic data. *Bioinformatics* **32**, 2847-2849 (2016).
